# Supplementary material for: Characterizing the n→π* interaction of pyridine with small ketones: a rotational study of pyridine⋯acetone and pyridine⋯2-butanone
Source: Royal Society of Chemistry journal article supplement (doi:10.1039/d2cp01611g), 2022-01-01
Supplement: d2cp01611g1.pdf [file d2cp01611g1.pdf]

## Characterizing the $n \rightarrow \pi^*$ interaction of pyridine with small ketones: a rotational study of pyridine⋯acetone and pyridine⋯2-butanone

Juan Carlos López,<sup>\*a</sup> Ibon Alkorta<sup>b</sup> Alberto Macario<sup>a†</sup> and Susana Blanco<sup>a</sup>

### Supporting Information

---

<sup>a</sup> Departamento de Química Física y Química Inorgánica, Facultad de Ciencias, IU CINQUIMA, Universidad de Valladolid, 47011 Valladolid (Spain), susana.blanco@uva.es (S.B.)

<sup>b</sup> Instituto de Química Médica (CSIC), Juan de la Cierva 3, 28006 Madrid (Spain); ibon@iqm.csic.es

<sup>†</sup> Current Address: Département de Physique Moléculaire, IPR (Institut de Physique de Rennes), CNRS-UMR 6251, Université de Rennes 1, F-35000 Rennes, France; alberto.macario@univ-rennes1.fr.

\*Correspondence: juancarlos.lopeza@uva.es.

## Contents:

Complete reference 57

Figure S1. Rotational spectra obtained from a mixture of pyridine and 2-butanone.

Figure S2. Rotational spectra obtained from a mixture of pyridine and acetone.

Figure S3. Configurations of the most stable conformers of the complexes between pyridine with formaldehyde, acetaldehyde, acetone and 2-butanone.

Figure S4. Potential energy surface predicted for the two internal rotation tops of pyridine...acetone complex.

Figure S5. Comparison of the predicted internal rotation potential energy functions of the bare acetone or 2-butanone molecule with their respective ones for their pyridine complexes.

Figure S6. Exponential relationship between  $\rho$ BCP (au) and the interatomic distance ( $\text{\AA}$ ).

Table S1. Spectroscopic parameters and energies calculated for the lowest energy forms of pyridine...2-butanone complex at B3LYP-D3BJ/6-311++G(2d,p) level of theory.

Table S2. Spectroscopic parameters and energies calculated for the lowest energy forms of pyridine...2-butanone complex at MP2/6-311++G(2d,p) level of theory.

Table S3. Spectroscopic parameters and energies calculated for the lowest energy forms of pyridine...2-butanone complex at CCSD/6-311++G(2d,p) level of theory.

Table S4. Spectroscopic parameters and energies calculated for the lowest energy forms of pyridine...acetone complex at B3LYP-D3BJ/6-311++G(2d,p) level of theory.

Table S5. Spectroscopic parameters and energies calculated for the lowest energy forms of pyridine...acetone complex at MP2/6-311++G(2d,p) level of theory.

Table S6. Spectroscopic parameters and energies calculated for the lowest energy forms of pyridine...acetone complex at CCSD/6-311++G(2d,p) level of theory.

Table S7. Rotational parameters obtained from the independent semirigid rotor analysis of the *A* and *E* methyl torsion states of the pyridine...2-butanone adduct.

Table S8. Predicted geometries for the global minimum form of pyridine...2-butanone complex at CCSD/6-311++G(2d,p) level of theory.

Table S9. Predicted geometries for the global minimum form of pyridine...acetone complex at CCSD/6-311++G(2d,p) level of theory.

Table S10. Electron density properties (au) at the intermolecular BCPs at CCSD/6-311++G(2d,p) computational level.

Table S11. Transition frequencies of A conformer of pyridine...2-butanone complex.

Table S12. Transition frequencies of A conformer of pyridine...acetone complex.

## **Complete reference 57**

Gaussian 16, Revision A.03,

M. J. Frisch, G. W. Trucks, H. B. Schlegel, G. E. Scuseria, M. A. Robb, J. R. Cheeseman, G. Scalmani, V. Barone, G. A. Petersson, H. Nakatsuji, X. Li, M. Caricato, A. V. Marenich, J. Bloino, B. G. Janesko, R. Gomperts, B. Mennucci, H. P. Hratchian, J. V. Ortiz, A. F. Izmaylov, J. L. Sonnenberg, D. Williams-Young, F. Ding, F. Lipparini, F. Egidi, J. Goings, B. Peng, A. Petrone, T. Henderson, D. Ranasinghe, V. G. Zakrzewski, J. Gao, N. Rega, G. Zheng, W. Liang, M. Hada, M. Ehara, K. Toyota, R. Fukuda, J. Hasegawa, M. Ishida, T. Nakajima, Y. Honda, O. Kitao, H. Nakai, T. Vreven, K. Throssell, J. A. Montgomery, Jr., J. E. Peralta, F. Ogliaro, M. J. Bearpark, J. J. Heyd, E. N. Brothers, K. N. Kudin, V. N. Staroverov, T. A. Keith, R. Kobayashi, J. Normand, K. Raghavachari, A. P. Rendell, J. C. Burant, S. S. Iyengar, J. Tomasi, M. Cossi, J. M. Millam, M. Klene, C. Adamo, R. Cammi, J. W. Ochterski, R. L. Martin, K. Morokuma, O. Farkas, J. B. Foresman, and D. J. Fox, Gaussian, Inc., Wallingford CT, 2016.

**Figure S1.** The rotational spectrum of a mixture of pyridine (PY) and 2-butanone (2BU) where the rotational transitions of the complex PY $\cdots$ 2BU have been identified.

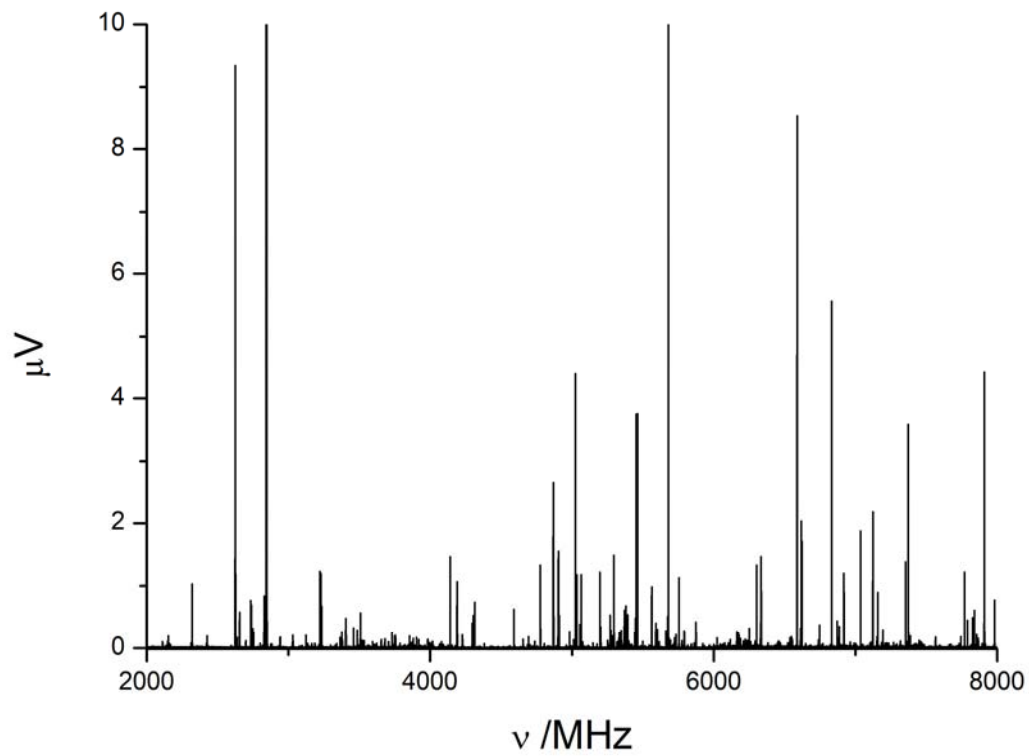

**Figure S2.** The rotational spectrum of a mixture of pyridine (PY) and acetone (ACE) where the rotational transitions of the complex PY $\cdots$ ACE have been identified.

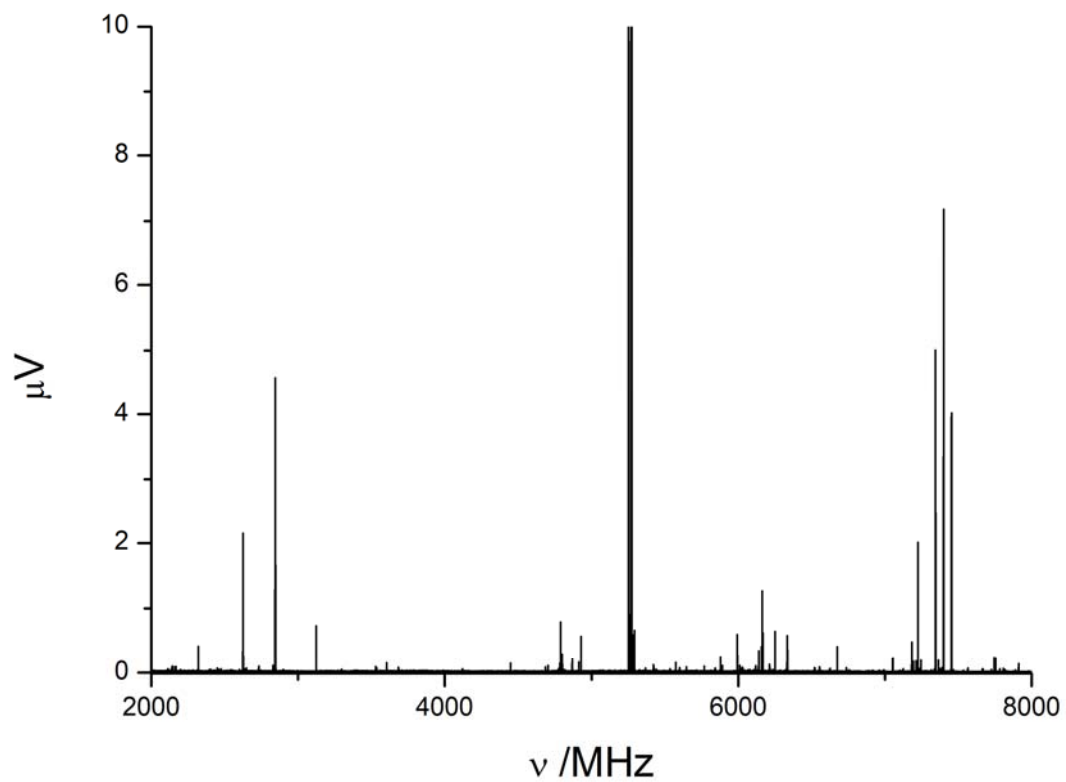

**Figure S3.** The most stable configuration for the pyridine···acetone and pyridine···2-butanone complexes corresponds to the one presenting a  $n \rightarrow \pi^*$  tetrel bond. For comparative purposes, the geometries of pyridine···formaldehyde and pyridine···acetaldehyde are also included in the figure. The  $N \cdots C$  is larger in the pyridine···acetone and pyridine···2-butanone complexes than in pyridine···formaldehyde and pyridine···acetaldehyde ones. On the contrary, the  $CH \cdots O$  distance decreases as the carbonyl molecules is larger. The dissociation energy of the complexes is similar for the two smallest complexes ( $15.9 \text{ kJ mol}^{-1}$ ) and for the two largest, it increases with the size of the carbonyl derivative up to  $19.0 \text{ kJ mol}^{-1}$  in pyridine···2-butanone. CCSD/6-311++G(2d,p) optimized geometries. The dissociation energy,  $D_e$ , has been obtained at CCSD(T)/6-311++G(2d,p)//CCSD/6-311++G(2d,p) computational level including the BSSE correction.

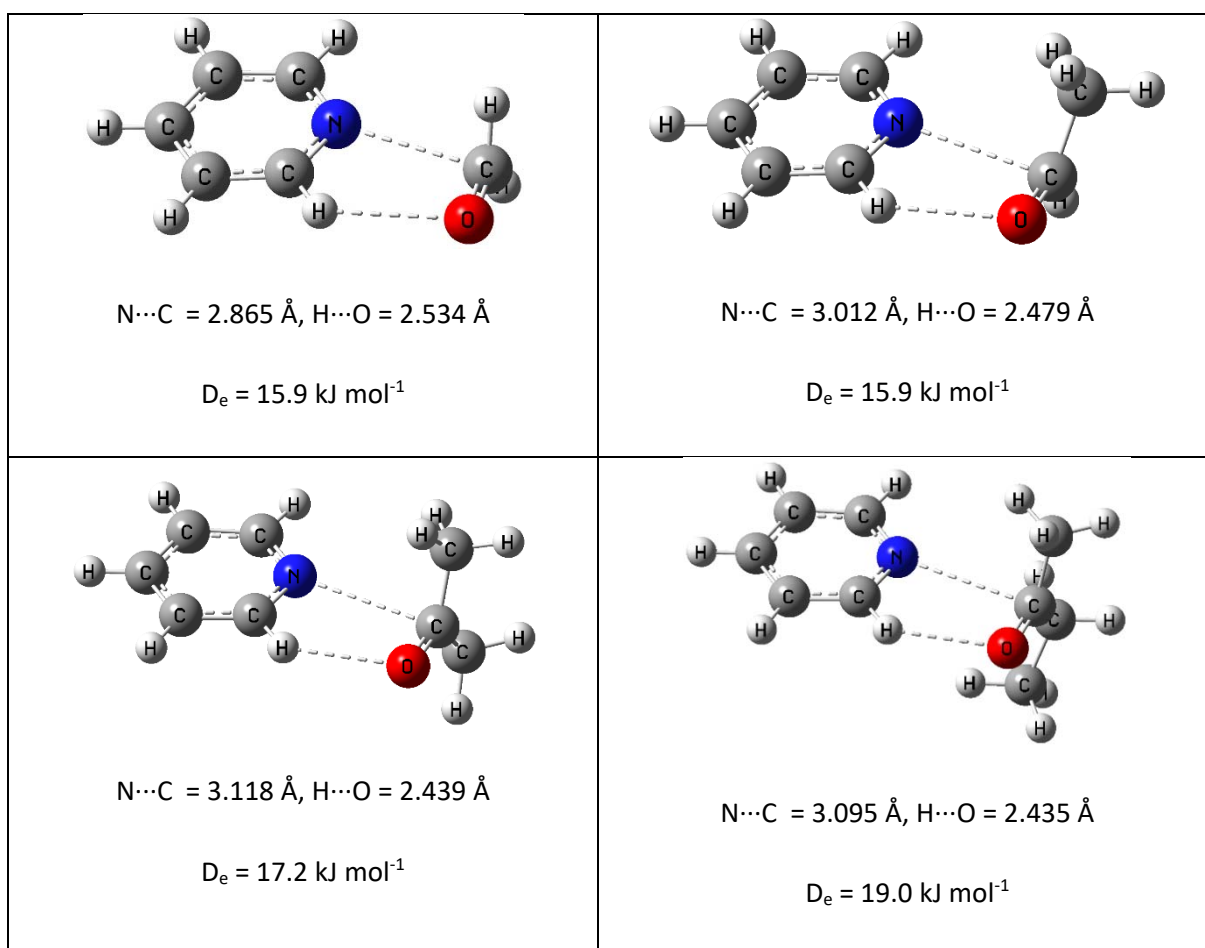

**Figure S4.** The MP2/6-311++G(2d,p) relaxed scan bidimensional potential energy function for the internal rotations of the two methyl tops for pyridine⋯acetone ( $\alpha = \angle \text{H}_{17}\text{-C}_{14}\text{-C}_{12}\text{-O}_{13}$ ,  $\alpha' = \angle \text{H}_{20}\text{-C}_{15}\text{-C}_{12}\text{-O}_{13}$ , see figure in Table S8 for the atom labelling). Below, the monodimensional energy profile is shown. The interaction of acetone with pyridine alters the form of the potential energy function around the minima as well as the phase of the potential energy function.

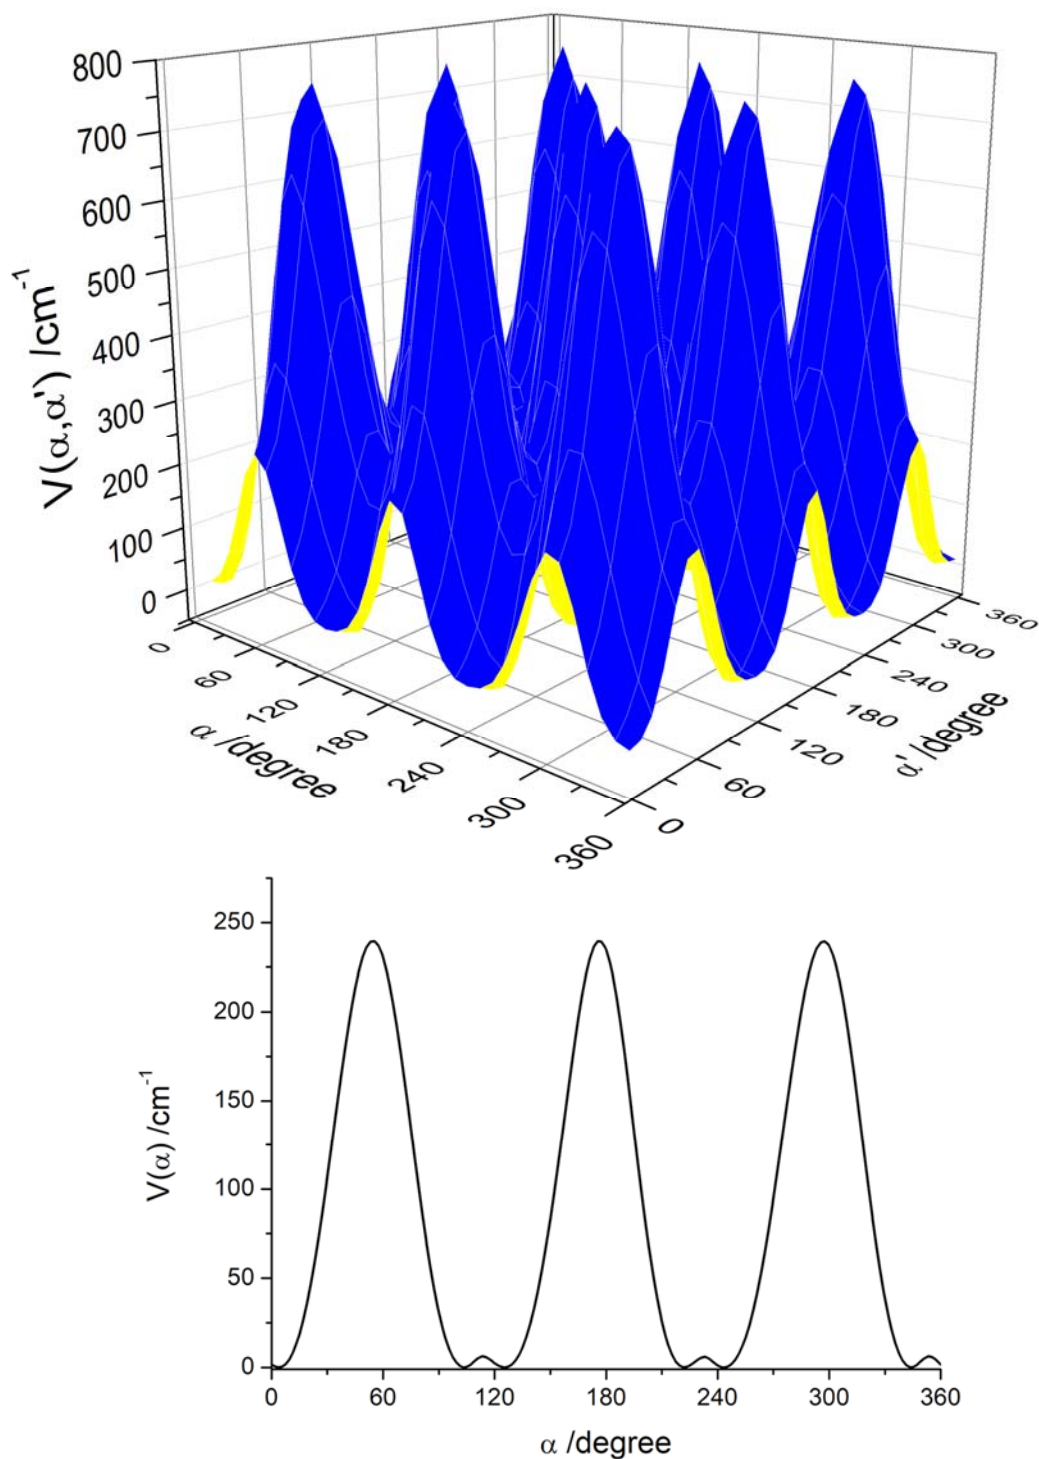

**Figure S5.** (a) The MP2/6-311++G(2d,p) internal rotation potential energy function of pyridine⋯acetone (black), free acetone (red), and comparison of their difference (blue) with the predicted dependence of  $r(\text{N}\cdots\text{C})$  Bürgi-Dunitz distance (green). The phase relationships between the difference function and the  $r(\text{N}\cdots\text{C})$  distance evidences that the  $n\rightarrow\pi^*$  tetrel bond might contribute to alter the internal rotation potential energy function and thus the barrier. (b) the same for pyridine⋯2-butanone.

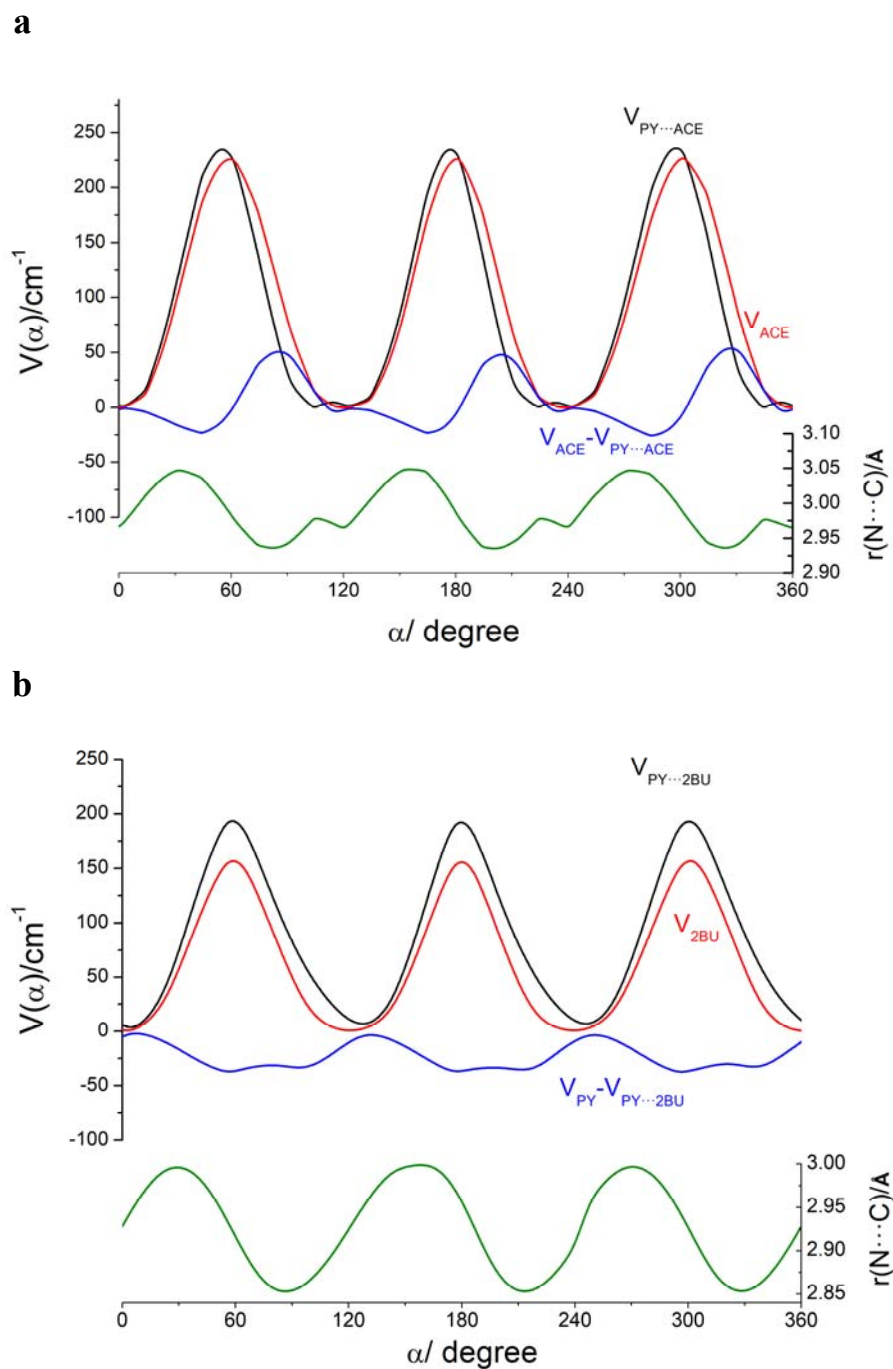



**Figure S6.** Exponential relationship between  $\rho_{\text{BCP}}$  (au) and the interatomic distance ( $\text{\AA}$ ) between pyridine and FA: formaldehyde; AC: Acetaldehyde; ACE: Acetone; 2BU: 2-butanone.

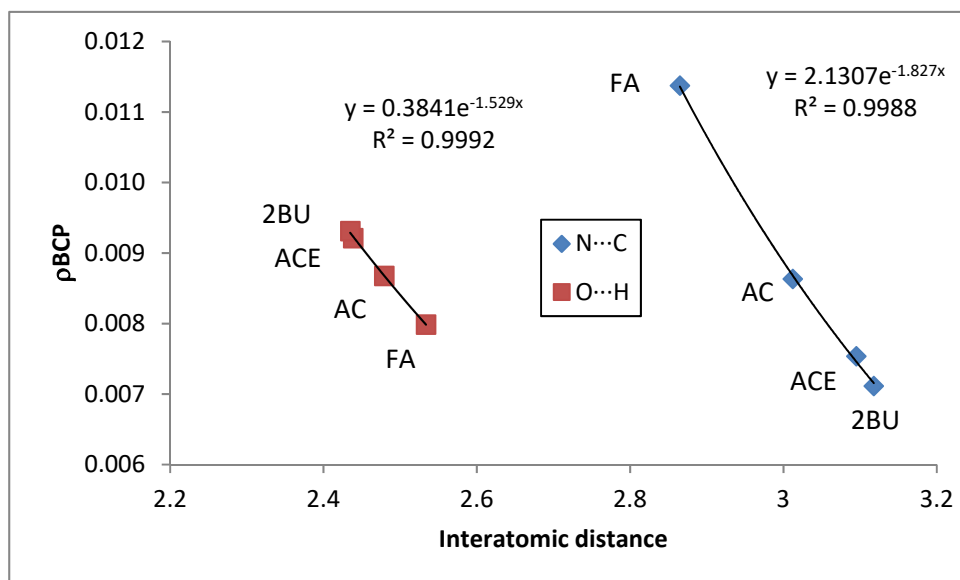

**Table S1.** Spectroscopic parameters and energies calculated for the lowest energy forms, labelled A and B, found for the pyridine···2-butanone adduct at B3LYP-D3BJ/6-311++G(2d,p) level and their comparison with the experimental values.

| Parameters <sup>a</sup>       | A            | B           | exp.                       |
|-------------------------------|--------------|-------------|----------------------------|
| $A/\text{MHz}$                | 1886.3       | 1531.4      | 1886.3549(12) <sup>b</sup> |
| $B/\text{MHz}$                | 551.7        | 779.8       | 540.40496(22)              |
| $C/\text{MHz}$                | 546.4        | 679.7       | 535.87643(24)              |
| $P_{aa}/\mu\text{\AA}^2$      | 786.5        | 530.8       | 805.18171(49)              |
| $P_{bb}/\mu\text{\AA}^2$      | 138.4        | 212.7       | 137.90743(49)              |
| $P_{cc}/\mu\text{\AA}^2$      | 129.5        | 117.3       | 130.00564(49)              |
| $\chi_{ab}/\text{MHz}$        | -4.46        | 2.76        | -4.0686(20)                |
| $\chi_{ac}/\text{MHz}$        | 3.23         | -4.28       | 3.1633(29)                 |
| $\chi_{bc}/\text{MHz}$        | 1.23         | 1.52        | 0.9053(29)                 |
| $\mu_a/\text{D}$              | 2.2          | 1.6         |                            |
| $\mu_b/\text{D}$              | -1.0         | 1.5         |                            |
| $\mu_c/\text{D}$              | 1.9          | -2.0        |                            |
| $E/h$                         | -480.9477308 | -480.947584 |                            |
| $\Delta E/\text{kJ mol}^{-1}$ | 0.0          | 0.4         |                            |

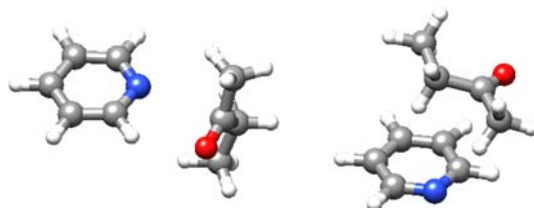

<sup>a</sup>  $A$ ,  $B$  and  $C$  are the rotational constants.  $P_{\alpha\alpha}$  ( $\alpha = a, b$  or  $c$ ) are the planar moments of inertia derived from the moments of inertia  $I_\alpha$  as for example  $P_{cc} = (I_a + I_b - I_c)/2$ .  $\chi_{aa}$ ,  $\chi_{bb}$ ,  $\chi_{cc}$ , are the  $^{14}\text{N}$  quadrupole coupling constants.  $\mu_a$ ,  $\mu_b$  and  $\mu_c$  are the electric dipole moment components (in Debye) along the principal inertial axes.  $E$  are the calculated electronic energies and  $\Delta E$  the energies relative to the global minimum A form. <sup>b</sup> Standard errors are given in parentheses in units of the last digits.

**Table S2.** Spectroscopic parameters and energies calculated for the lowest energy forms, labelled A and B, found for the pyridine···2-butanone adduct at MP2/6-311++G(2d,p) level and their comparison with the experimental values.

| Parameters <sup>a</sup>      | A            | B            | exp.                       |
|------------------------------|--------------|--------------|----------------------------|
| $A/\text{MHz}$               | 1893.4       | 1531.4       | 1886.3549(12) <sup>b</sup> |
| $B/\text{MHz}$               | 565.6        | 815.1        | 540.40496(22)              |
| $C/\text{MHz}$               | 560.7        | 705.6        | 535.87643(24)              |
| $P_{aa}/\mu\text{\AA}^2$     | 764.0        | 503.1        | 805.18171(49)              |
| $P_{bb}/\mu\text{\AA}^2$     | 137.3        | 213.1        | 137.90743(49)              |
| $P_{cc}/\mu\text{\AA}^2$     | 129.6        | 116.9        | 130.00564(49)              |
| $\chi_{ab}/\text{MHz}$       | -4.38        | 2.70         | -4.0686(20)                |
| $\chi_{ac}/\text{MHz}$       | 3.10         | -3.77        | 3.1633(29)                 |
| $\chi_{bc}/\text{MHz}$       | 1.28         | 1.07         | 0.9053(29)                 |
| $\mu_a/\text{D}$             | 2.3          | 1.3          |                            |
| $\mu_b/\text{D}$             | 0.8          | 1.5          |                            |
| $\mu_c/\text{D}$             | -1.9         | -1.6         |                            |
| $E/h$                        | -479.5663233 | -479.5670042 |                            |
| $\Delta E/\text{kJmol}^{-1}$ | 0.0          | 1.8          |                            |

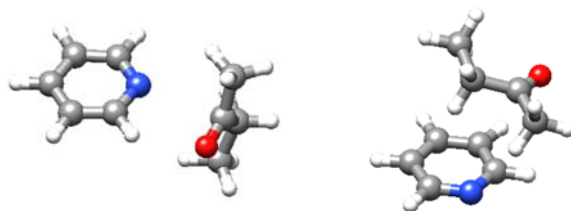

<sup>a</sup>  $A$ ,  $B$  and  $C$  are the rotational constants.  $P_{\alpha\alpha}$  ( $\alpha = a, b$  or  $c$ ) are the planar moments of inertia derived from the moments of inertia  $I_\alpha$  as for example  $P_{cc} = (I_a + I_b - I_c)/2$ .  $\chi_{aa}$ ,  $\chi_{bb}$ ,  $\chi_{cc}$ , are the  $^{14}\text{N}$  quadrupole coupling constants.  $\mu_a$ ,  $\mu_b$  and  $\mu_c$  are the electric dipole moment components (in Debye) along the principal inertial axes.  $E$  are the calculated electronic energies and  $\Delta E$  the energies relative to the global minimum A form.

<sup>b</sup> Standard errors are given in parentheses in units of the last digits.

**Table S3.** Spectroscopic parameters and energies calculated for the lowest energy forms, A and B, found for the pyridine $\cdots$ 2-butanone adduct at CCSD/6-311++G(2d,p) level and their comparison with the experimental values. The energies calculated at CCSD(T)/6-311++G(2d,p) level for the CCSD geometries are given.

| Parameters <sup>a</sup>                               | A           | B            | Exp.                       |
|-------------------------------------------------------|-------------|--------------|----------------------------|
| $A/\text{MHz}$                                        | 1891.2      | 1526.0       | 1886.3549(12) <sup>b</sup> |
| $B/\text{MHz}$                                        | 539.2       | 756.3        | 540.40496(22)              |
| $C/\text{MHz}$                                        | 533.7       | 661.6        | 535.87643(24)              |
| $P_{aa}/\mu\text{\AA}^2$                              | 808.5       | 550.5        | 805.18171(49)              |
| $P_{bb}/\mu\text{\AA}^2$                              | 138.4       | 213.4        | 137.90743(49)              |
| $P_{cc}/\mu\text{\AA}^2$                              | 128.8       | 117.8        | 130.00564(49)              |
| $\chi_{aa}/\text{MHz}$                                | -4.47       | 2.87         | -4.0686(20)                |
| $\chi_{bb}/\text{MHz}$                                | 2.95        | -3.90        | 3.1633(29)                 |
| $\chi_{cc}/\text{MHz}$                                | 1.52        | 1.02         | 0.9053(29)                 |
| $\mu_a/\text{D}$                                      | 2.2         | -1.2         |                            |
| $\mu_b/\text{D}$                                      | -1.0        | 1.5          |                            |
| $\mu_c/\text{D}$                                      | 1.8         | 1.7          |                            |
| $E/\text{h}$                                          | -479.629065 | -479.6281605 |                            |
| $\Delta E/\text{kJmol}^{-1}$                          | 0.00        | 2.4          |                            |
| $E_{\text{CCSD(T)}/\text{h}}$                         | -479.713866 | -479.713345  |                            |
| $\Delta E_{\text{CCSD(T)}/\text{kJmol}^{-1}}$         | 0.00        | 1.4          |                            |
| $D_e(\text{BSSE})_{\text{CCSD(T)}/\text{kJmol}^{-1}}$ | 19.0        | 16.5         |                            |

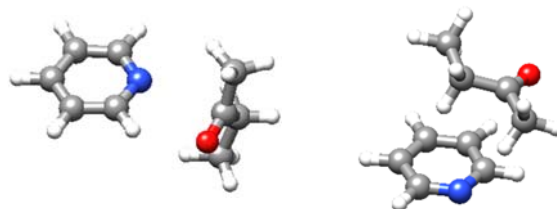

<sup>a</sup>  $A$ ,  $B$  and  $C$  are the rotational constants.  $P_{\alpha\alpha}$  ( $\alpha = a, b$  or  $c$ ) are the planar moments of inertia derived from the moments of inertia  $I_\alpha$  as for example  $P_{cc} = (I_a + I_b - I_c)/2$ .  $\chi_{aa}$ ,  $\chi_{bb}$ ,  $\chi_{cc}$ , are the  $^{14}\text{N}$  quadrupole coupling constants.  $\mu_a$ ,  $\mu_b$  and  $\mu_c$  are the electric dipole moment components (in Debye) along the principal inertial axes.  $E$  are the calculated electronic energies,  $\Delta E$  the energies relative to the global minimum A form and  $D_e(\text{BSSE})_{\text{CCSD(T)}}$  dissociation energy calculated using counterpoise procedure (S. F. Boys, F. Bernardi, *Mol. Phys.* **1970**, *19*, 553–566). <sup>b</sup> Standard errors are given in parentheses in units of the last digits.

**Table S4.** Spectroscopic parameters and energies calculated for the lowest energy forms, A and B, found for the pyridine···acetone adduct at B3LYP-D3BJ/6-311++G(2d,p) level and their comparison with the experimental values.

| Parameters <sup>a</sup>      | A            | B      | exp.                       |
|------------------------------|--------------|--------|----------------------------|
| $A/\text{MHz}$               | 2727.1       | 2142.2 | 2722.6132(14) <sup>b</sup> |
| $B/\text{MHz}$               | 635.5        | 833.0  | 627.32259(26)              |
| $C/\text{MHz}$               | 581.7        | 787.7  | 575.35390(23)              |
| $P_{aa}/\mu\text{\AA}^2$     | 739.4        | 506.2  | 749.18477(39)              |
| $P_{bb}/\mu\text{\AA}^2$     | 129.5        | 135.4  | 129.19479(39)              |
| $P_{cc}/\mu\text{\AA}^2$     | 55.9         | 100.5  | 56.42802(39)               |
| $\chi_{ab}/\text{MHz}$       | -4.53        | 1.79   | -4.1442(86)                |
| $\chi_{ac}/\text{MHz}$       | 0.93         | -3.45  | 0.8378(91)                 |
| $\chi_{bc}/\text{MHz}$       | 3.60         | 1.66   | 3.3064(91)                 |
| $\mu_a/\text{D}$             | 2.1          | 1.9    |                            |
| $\mu_b/\text{D}$             | -2.2         | 0.2    |                            |
| $\mu_c/\text{D}$             | 0.1          | 2.5    |                            |
| $E/h$                        | -441.6163804 |        |                            |
| $\Delta E/\text{kJmol}^{-1}$ | 0.0          | 0.5    |                            |

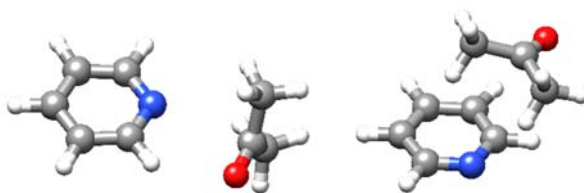

<sup>a</sup>  $A$ ,  $B$  and  $C$  are the rotational constants.  $P_{\alpha\alpha}$  ( $\alpha = a, b$  or  $c$ ) are the planar moments of inertia derived from the moments of inertia  $I_{\alpha}$  as for example  $P_{cc} = (I_a + I_b - I_c)/2$ .  $\chi_{aa}$ ,  $\chi_{bb}$ ,  $\chi_{cc}$ , are the  $^{14}\text{N}$  quadrupole coupling constants.  $\mu_a$ ,  $\mu_b$  and  $\mu_c$  are the electric dipole moment components (in Debye) along the principal inertial axes.  $E$  are the calculated electronic energies and  $\Delta E$  the energies relative to the global minimum A form. <sup>b</sup> Standard errors are given in parentheses in units of the last digits.

**Table S5.** Spectroscopic parameters and energies calculated for the lowest energy forms, A and B, found for the pyridine⋯acetone adduct at MP2/6-311++G(2d,p) level and their comparison with the experimental values.

| Parameters <sup>a</sup>                 | A            | B            | exp.                       |
|-----------------------------------------|--------------|--------------|----------------------------|
| <i>A</i> /MHz                           | 2722.1       | 2134.9       | 2722.6132(14) <sup>b</sup> |
| <i>B</i> /MHz                           | 659.4        | 870.8        | 627.32259(26)              |
| <i>C</i> /MHz                           | 600.9        | 819.0        | 575.35390(23)              |
| <i>P</i> <sub>aa</sub> /μÅ <sup>2</sup> | 710.9        | 480.4        | 749.18477(39)              |
| <i>P</i> <sub>bb</sub> /μÅ <sup>2</sup> | 130.1        | 136.7        | 129.19479(39)              |
| <i>P</i> <sub>cc</sub> /μÅ <sup>2</sup> | 55.5         | 100.0        | 56.42802(39)               |
| $\chi_{ab}$ /MHz                        | -4.40        | 2.05         | -4.1442(86)                |
| $\chi_{ac}$ /MHz                        | 0.98         | -4.06        | 0.8378(91)                 |
| $\chi_{bc}$ /MHz                        | 3.42         | 2.01         | 3.3064(91)                 |
| $\mu_a$ /D                              | 2.2          | 1.55         |                            |
| $\mu_b$ /D                              | -2.2         | -0.15        |                            |
| $\mu_c$ /D                              | 0.2          | 2.19         |                            |
| <i>E</i> /h                             | -440.3615441 | -440.3621202 |                            |
| $\Delta E$ /kJmol <sup>-1</sup>         | 0.0          | -1.5         |                            |

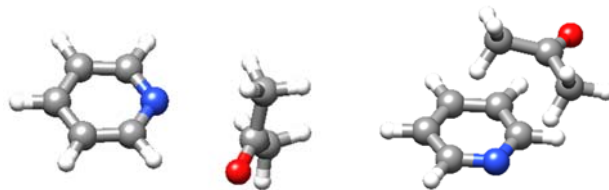

<sup>a</sup> *A*, *B* and *C* are the rotational constants.  $P_{\alpha\alpha}$  ( $\alpha = a, b$  or  $c$ ) are the planar moments of inertia derived from the moments of inertia  $I_\alpha$  as for example  $P_{cc} = (I_a + I_b - I_c)/2$ .  $\chi_{aa}$ ,  $\chi_{bb}$ ,  $\chi_{cc}$ , are the <sup>14</sup>N quadrupole coupling constants.  $\mu_a$ ,  $\mu_b$  and  $\mu_c$  are the electric dipole moment components (in Debye) along the principal inertial axes. *E* are the calculated electronic energies and  $\Delta E$  the energies relative to the global minimum A form.

<sup>b</sup> Standard errors are given in parentheses in units of the last digits.

**Table S6.** Spectroscopic parameters and energies calculated for the lowest energy forms, A and B, found for the pyridine⋯acetone adduct at CCSD/6-311++G(2d,p) level and their comparison with the experimental values. The energies calculated at CCSD(T)/6-311++G(2d,p) level for the CCSD geometries are given.

| Parameters <sup>a</sup>                               | A             | B             | Exp.                       |
|-------------------------------------------------------|---------------|---------------|----------------------------|
| $A/\text{MHz}$                                        | 2722.8        | 2137.7        | 2722.6132(14) <sup>b</sup> |
| $B/\text{MHz}$                                        | 630.4         | 809.7         | 627.32259(26)              |
| $C/\text{MHz}$                                        | 577.3         | 765.8         | 575.35390(23)              |
| $P_{aa}/\mu\text{\AA}^2$                              | 745.7         | 523.8         | 749.18477(39)              |
| $P_{bb}/\mu\text{\AA}^2$                              | 129.7         | 136.1         | 129.19479(39)              |
| $P_{cc}/\mu\text{\AA}^2$                              | 55.9          | 100.3         | 56.42802(39)               |
| $\chi_{aa}/\text{MHz}$                                | -4.47         | 2.04          | -4.1442(86)                |
| $\chi_{bb}/\text{MHz}$                                | 0.94          | -3.97         | 0.8378(91)                 |
| $\chi_{cc}/\text{MHz}$                                | 3.53          | 1.93          | 3.3064(91)                 |
| $\mu_a/\text{D}$                                      | -2.1          | 1.5           |                            |
| $\mu_b/\text{D}$                                      | -2.2          | -0.1          |                            |
| $\mu_c/\text{D}$                                      | -0.1          | -2.3          |                            |
| $E/h$                                                 | -440.4136567  | -440.4128049  |                            |
| $\Delta E/\text{kJmol}^{-1}$                          | 0.0           | 2.2           |                            |
| $E_{\text{CCSD(T)}/h}$                                | -479.71386599 | -479.71334506 |                            |
| $\Delta E_{\text{CCSD(T)}/\text{kJmol}^{-1}}$         | 0.00          | 1.3           |                            |
| $D_e(\text{BSSE})_{\text{CCSD(T)}/\text{kJmol}^{-1}}$ | 17.2          | 15.1          |                            |

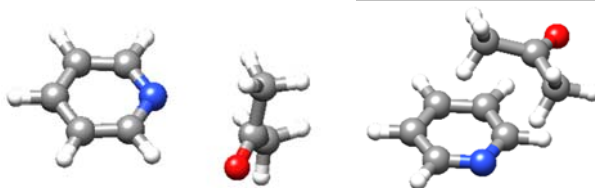

<sup>a</sup>  $A$ ,  $B$  and  $C$  are the rotational constants.  $P_{\alpha\alpha}$  ( $\alpha = a, b$  or  $c$ ) are the planar moments of inertia derived from the moments of inertia  $I_\alpha$  as for example  $P_{cc} = (I_a + I_b - I_c)/2$ .  $\chi_{aa}$ ,  $\chi_{bb}$ ,  $\chi_{cc}$ , are the  $^{14}\text{N}$  quadrupole coupling constants.  $\mu_a$ ,  $\mu_b$  and  $\mu_c$  are the electric dipole moment components (in Debye) along the principal inertial axes.  $E$  are the calculated electronic energies,  $\Delta E$  the energies relative to the global minimum A form and  $D_e(\text{BSSE})$  dissociation energy calculated using counterpoise procedure (S. F. Boys, F. Bernardi, *Mol. Phys.* **1970**, *19*, 553–566). <sup>b</sup> Standard errors are given in parentheses in units of the last digits.

**Table S7.** Rotational parameters obtained from the independent semirigid rotor analysis of the *A* and *E* methyl torsion states of the pyridine $\cdots$ 2-butanone adduct and their comparison with the CCSD/6-311++G(2d,p) *ab initio* constants for the most stable form of the complex (see Figure 3 and Tables S1-S3)

| Fitted Parameters <sup>a</sup>        | <i>A</i>                   | <i>E</i>     | <i>Ab initio</i> |
|---------------------------------------|----------------------------|--------------|------------------|
| <i>A</i> /MHz                         | 1886.3520(16) <sup>b</sup> | 1886.300(16) | 1891.2           |
| <i>B</i> /MHz                         | 540.44497(20)              | 540.3406(24) | 539.2            |
| <i>C</i> /MHz                         | 535.89541(19)              | 535.8058(74) | 533.7            |
| <i>D</i> <sub>J</sub> /kHz            | 0.2252(18)                 | 0.2129(86)   |                  |
| <i>D</i> <sub>JK</sub> /kHz           | 2.216(15)                  | -70.2(46)    |                  |
| <i>D</i> <sub>K</sub> /kHz            | -1.34(35)                  | [0.]         |                  |
| <i>d</i> <sub>1</sub> /kHz            | -0.0059(14)                | -0.103(30)   |                  |
| <i>d</i> <sub>2</sub> /kHz            | 0.00937(75)                | -3.6(13)     |                  |
| <i>D</i> <sub>a</sub> /MHz            | -                          | 2.033(42)    |                  |
| <i>D</i> <sub>b</sub> /MHz            | -                          | 7.72(64)     |                  |
| 1.5( $\chi_{aa}$ )/MHz                | -6.1036(49)                | -6.1005(76)  | -6.70            |
| 0.25( $\chi_{bb}$ - $\chi_{cc}$ )/MHz | 0.5639(14)                 | 0.5634(27)   | 0.36             |
| N                                     | 168                        | 75           |                  |
| $\sigma$ /kHz                         | 5.7                        | 6.0          |                  |

<sup>a</sup> *A*, *B*, and *C* are rotational constants. *D*<sub>J</sub>, *D*<sub>JK</sub>, *D*<sub>K</sub>, *d*<sub>1</sub>, *d*<sub>2</sub> are quartic centrifugal distortion constants. *D*<sub>a</sub> and *D*<sub>b</sub> are the coefficients of angular momentum perturbation operators (*D*<sub>a</sub>**P**<sub>a</sub>, *D*<sub>b</sub>**P**<sub>b</sub>) needed to account for the deviations of the E rotational transitions from the semirigid rotor behavior.  $\chi_{aa}$ ,  $\chi_{bb}$ , and  $\chi_{cc}$  are <sup>14</sup>N nuclear quadrupole coupling constants. N is the number of hyperfine quadrupole components fitted.  $\sigma$  is the rms deviation of the fit. <sup>b</sup> Standard errors are given in parentheses in units of the last digit.



**Table S8.** Optimized geometry (Å) and energy (hartree) at CCSD/6-311++G(2d,p) computational level for pyridine···2-butanone A form.

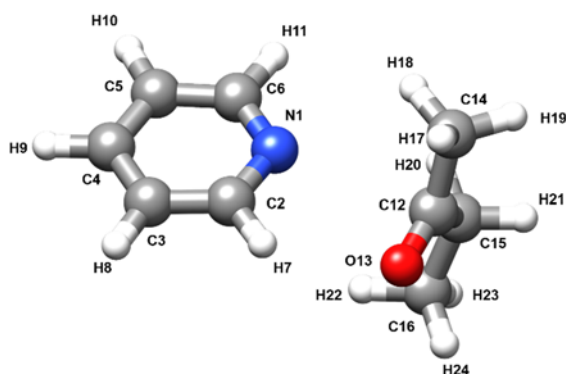

E(CCSD): -479.6290657

N1, -0.745279,-0.084724,-0.412211  
 C2, -1.104021, 0.551879, 0.711018  
 C3, -2.427009, 0.672639, 1.136003  
 C4, -3.433361, 0.104771, 0.359986  
 C5, -3.074628,-0.560451,-0.809906  
 C6, -1.724353,-0.625841,-1.148236  
 H7, -0.292131, 0.980880, 1.291381  
 H8, -2.654451, 1.200934, 2.055826  
 H9, -4.474437, 0.178489, 0.659343  
 H10,-3.820181,-1.020553,-1.449819  
 H11,-1.412833,-1.138564,-2.055366  
 C12, 2.283684, 0.481307,-0.123394  
 O13, 2.121158, 0.986321, 0.968509  
 C14, 2.315569, 1.314445,-1.387720  
 C15, 2.489309,-1.012560,-0.298671  
 C16, 2.207307,-1.820001, 0.962756  
 H17, 2.336330, 2.375606,-1.136486  
 H18, 1.417757, 1.093425,-1.972564  
 H19, 3.187451, 1.056598,-1.997663  
 H20, 1.856757,-1.340102,-1.130618  
 H21, 3.527753,-1.152587,-0.630528  
 H22, 1.162687,-1.706137, 1.262377  
 H23, 2.404043,-2.882378, 0.791354  
 H24, 2.832235,-1.479599, 1.791457

**Table S9.** Optimized geometry (Å) and energy (hartree) at CCSD/6-311++G(2d,p) computational level for pyridine...acetone A form.

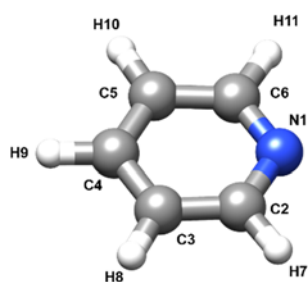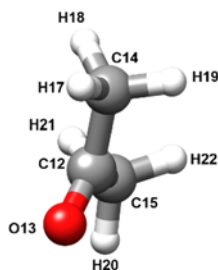

E(CCSD) = -440.4136567

N1, -0.540070,-0.418384, 0.018156  
 C2, -0.879347, 0.878039, 0.015902  
 C3, -2.200246, 1.326061, 0.007497  
 C4, -3.225918, 0.385228, 0.000767  
 C5, -2.887727,-0.965855, 0.003022  
 C6, -1.537820,-1.311595, 0.011608  
 H7, -0.053518, 1.583533, 0.021057  
 H8, -2.411170, 2.390202, 0.006136  
 H9, -4.265970, 0.696882,-0.005661  
 H10,-3.648697,-1.739114,-0.001973  
 H11,-1.242536,-2.358311, 0.013542  
 C12, 2.530073, 0.123899,-0.008617  
 O13, 2.371472, 1.326482, 0.035454  
 C14, 2.574028,-0.626455,-1.323040  
 C15, 2.722383,-0.701830, 1.245628  
 H16, 2.238965, 0.020736,-2.133987  
 H17, 1.945104,-1.518448,-1.271228  
 H18, 3.603872,-0.948190,-1.517117  
 H19, 2.802129,-0.049372, 2.115671  
 H20, 1.862390,-1.367660, 1.361610  
 H21, 3.620628,-1.322383, 1.159401

**Table S10.** Electron density properties (au) at the intermolecular BCPs at CCSD/6-311++G(2d,p) computational level for the complexes pyridine...formaldehyde (PY...FA), pyridine...acetaldehyde (PY...AC), pyridine...acetone (PY...ACE) and pyridine...2-butanone (PY...2BU)

| Complex  | Contact | $\rho$ | $\nabla^2 \rho$ | $H$    |
|----------|---------|--------|-----------------|--------|
| PY...FA  | N...C   | 0.0114 | 0.0397          | 0.0015 |
| PY...FA  | O...H   | 0.0080 | 0.0284          | 0.0010 |
| PY...AC  | N...C   | 0.0086 | 0.0306          | 0.0013 |
| PY...AC  | O...H   | 0.0087 | 0.0306          | 0.0010 |
| PY...ACE | N...C   | 0.0071 | 0.0257          | 0.0011 |
| PY...ACE | O...H   | 0.0092 | 0.0327          | 0.0011 |
| PY...2BU | N...C   | 0.0075 | 0.0269          | 0.0011 |
| PY...2BU | O...H   | 0.0093 | 0.0332          | 0.0011 |

**Table S11.** Observed rotational frequencies for the conformer A of the pyridine···2-butanone complex.

| J | K-K <sub>+</sub> | J`K`-K` <sub>+</sub> | Sym | F | F` | obs/MHz  | Err/MHz | obs-calc/MHz |       |       |
|---|------------------|----------------------|-----|---|----|----------|---------|--------------|-------|-------|
| 2 | 1 2              | 1 1 1                | A   | 2 | 1  | 2147.103 | 0.015   | 0.005        |       |       |
|   |                  |                      |     | 1 | 1  | 2147.559 | 0.015   | 0.008        |       |       |
|   |                  |                      |     | 2 | 2  | 2148.051 | 0.015   | 0.005        |       |       |
|   |                  |                      |     | 3 | 2  | 2148.341 | 0.015   | 0.003        |       |       |
| 2 | 0 2              | 1 0 1                | A   | 1 | 0  | 2149.913 | 0.015   | -0.010       |       |       |
|   |                  |                      |     | 2 | 2  | 2151.440 | 0.015   | -0.002       |       |       |
|   |                  |                      |     | 1 | 0  | 2151.645 | 0.015   | 0.001        |       |       |
|   |                  |                      |     | 2 | 1  | 2152.655 | 0.015   | -0.007       |       |       |
|   |                  |                      |     | 3 | 2  | 2152.748 | 0.015   | 0.000        |       |       |
| 2 | 0 2              | 1 0 1                | E   | 1 | 1  | 2154.692 | 0.015   | -0.003       |       |       |
|   |                  |                      |     | 2 | 2  | 2150.968 | 0.015   | 0.000        |       |       |
|   |                  |                      |     | 1 | 0  | 2151.177 | 0.015   | 0.007        |       |       |
|   |                  |                      |     | 2 | 1  | 2152.188 | 0.015   | 0.000        |       |       |
| 2 | 1 1              | 1 1 0                | A   | 3 | 2  | 2152.276 | 0.015   | 0.001        |       |       |
|   |                  |                      |     | 1 | 1  | 2154.216 | 0.015   | -0.004       |       |       |
|   |                  |                      |     | 3 | 2  | 2157.485 | 0.015   | 0.000        |       |       |
|   |                  |                      |     | 1 | 1  | 2157.780 | 0.015   | 0.002        |       |       |
| 2 | 1 1              | 1 1 0                | E   | 1 | 2  | 2158.057 | 0.015   | 0.007        |       |       |
|   |                  |                      |     | 1 | 0  | 2158.462 | 0.015   | 0.005        |       |       |
|   |                  |                      |     | 2 | 1  | 2155.607 | 0.030   | -0.027       |       |       |
| 1 | 1 0              | 0 0 0                | A   | 0 | 1  | 2426.338 | 0.015   | -0.005       |       |       |
|   |                  |                      |     | 2 | 1  | 2426.748 | 0.015   | -0.002       |       |       |
|   |                  |                      |     | 1 | 1  | 2427.019 | 0.015   | -0.003       |       |       |
| 1 | 1 0              | 0 0 0                | E   | 1 | 1  | 2427.893 | 0.030   | 0.021        |       |       |
|   |                  |                      |     | 4 | 0  | 4        | 3       | 2943.221     | 0.015 | 0.002 |
| 4 | 0 4              | 3 1 2                | A   | 5 | 4  | 2943.358 | 0.015   | 0.006        |       |       |
|   |                  |                      |     | 3 | 2  | 2940.789 | 0.015   | -0.005       |       |       |
| 4 | 0 4              | 3 1 2                | E   | 5 | 4  | 2940.930 | 0.015   | 0.005        |       |       |
|   |                  |                      |     | 3 | 3  | 3221.607 | 0.015   | -0.001       |       |       |
| 3 | 1 3              | 2 1 2                | A   | 4 | 3  | 3222.251 | 0.015   | 0.003        |       |       |
|   |                  |                      |     | 2 | 1  | 3222.308 | 0.015   | -0.002       |       |       |
|   |                  |                      |     | 3 | 3  | 3221.607 | 0.015   | 0.002        |       |       |
| 3 | 1 3              | 2 1 2                | E   | 4 | 3  | 3222.251 | 0.015   | 0.001        |       |       |
|   |                  |                      |     | 2 | 1  | 3222.308 | 0.015   | 0.002        |       |       |
|   |                  |                      |     | 3 | 0  | 3        | 2       | 3227.650     | 0.015 | 0.004 |
| 3 | 0 3              | 2 0 2                | A   | 2 | 1  | 3228.744 | 0.030   | -0.002       |       |       |
|   |                  |                      |     | 2 | 1  | 3228.744 | 0.030   | -0.002       |       |       |
|   |                  |                      |     | 3 | 2  | 3228.953 | 0.015   | 0.001        |       |       |
|   |                  |                      |     | 4 | 3  | 3228.989 | 0.015   | -0.009       |       |       |
|   |                  |                      |     | 2 | 2  | 3230.781 | 0.015   | 0.002        |       |       |
|   |                  |                      |     | 3 | 0  | 3        | 2       | 3226.936     | 0.015 | 0.000 |
|   |                  |                      |     | 2 | 1  | 3228.037 | 0.015   | 0.000        |       |       |
| 3 | 0 3              | 2 0 2                | E   | 3 | 2  | 3228.243 | 0.015   | 0.000        |       |       |
|   |                  |                      |     | 4 | 3  | 3228.280 | 0.015   | -0.009       |       |       |
|   |                  |                      |     | 3 | 3  | 3226.936 | 0.015   | -0.001       |       |       |
|   |                  |                      |     | 2 | 2  | 3230.071 | 0.015   | 0.001        |       |       |
|   |                  |                      |     | 3 | 2  | 3229.219 | 0.030   | -0.013       |       |       |
| 3 | 2 1              | 2 2 0                | A   | 3 | 3  | 3229.281 | 0.030   | 0.004        |       |       |
|   |                  |                      |     | 4 | 3  | 3229.281 | 0.030   | 0.001        |       |       |
| 3 | 1 2              | 2 1 1                | A   | 3 | 3  | 3234.527 | 0.015   | -0.002       |       |       |
|   |                  |                      |     | 3 | 2  | 3235.545 | 0.015   | 0.000        |       |       |
|   |                  |                      |     | 2 | 1  | 3235.843 | 0.015   | -0.001       |       |       |
|   |                  |                      |     | 4 | 3  | 3235.922 | 0.015   | 0.000        |       |       |
|   |                  |                      |     | 2 | 2  | 3237.432 | 0.015   | 0.006        |       |       |
| 3 | 1 2              | 2 1 1                | E   | 3 | 3  | 3234.317 | 0.015   | -0.008       |       |       |
|   |                  |                      |     | 3 | 2  | 3235.321 | 0.015   | -0.006       |       |       |
|   |                  |                      |     | 2 | 1  | 3235.635 | 0.015   | -0.008       |       |       |
|   |                  |                      |     | 4 | 3  | 3235.709 | 0.015   | -0.005       |       |       |

|   |   |   |   |   |   |   |   |   |          |       |        |
|---|---|---|---|---|---|---|---|---|----------|-------|--------|
| 3 | 1 | 2 | 2 | 1 | 1 | E | 2 | 2 | 3237.189 | 0.030 | -0.014 |
| 2 | 1 | 2 | 1 | 0 | 1 | A | 3 | 2 | 3493.884 | 0.015 | 0.001  |
| 2 | 1 | 1 | 1 | 0 | 1 | A | 1 | 0 | 3506.423 | 0.015 | -0.003 |
|   |   |   |   |   |   |   | 2 | 2 | 3506.673 | 0.015 | -0.002 |
|   |   |   |   |   |   |   | 3 | 2 | 3507.690 | 0.015 | -0.002 |
|   |   |   |   |   |   |   | 2 | 1 | 3507.892 | 0.015 | -0.004 |
|   |   |   |   |   |   |   | 1 | 1 | 3509.476 | 0.015 | -0.001 |
| 2 | 1 | 1 | 1 | 0 | 1 | E | 1 | 0 | 3506.937 | 0.015 | 0.007  |
|   |   |   |   |   |   |   | 2 | 2 | 3507.205 | 0.015 | 0.004  |
|   |   |   |   |   |   |   | 3 | 2 | 3508.208 | 0.015 | 0.005  |
|   |   |   |   |   |   |   | 2 | 1 | 3508.427 | 0.015 | 0.005  |
|   |   |   |   |   |   |   | 1 | 1 | 3509.982 | 0.015 | 0.001  |
| 7 | 1 | 6 | 6 | 2 | 4 | A | 8 | 7 | 3552.588 | 0.030 | -0.007 |
|   |   |   |   |   |   |   | 6 | 5 | 3552.665 | 0.030 | -0.009 |
| 7 | 1 | 6 | 6 | 2 | 4 | E | 8 | 7 | 3549.715 | 0.030 | 0.021  |
|   |   |   |   |   |   |   | 6 | 5 | 3549.791 | 0.030 | 0.016  |
| 8 | 2 | 7 | 8 | 1 | 7 | A | 7 | 7 | 3962.177 | 0.015 | 0.001  |
|   |   |   |   |   |   |   | 9 | 9 | 3962.250 | 0.015 | 0.002  |
|   |   |   |   |   |   |   | 8 | 8 | 3962.831 | 0.015 | 0.003  |
| 7 | 2 | 6 | 7 | 1 | 6 | A | 6 | 6 | 3980.366 | 0.015 | 0.000  |
|   |   |   |   |   |   |   | 8 | 8 | 3980.457 | 0.015 | 0.000  |
|   |   |   |   |   |   |   | 7 | 7 | 3981.085 | 0.015 | 0.001  |
| 6 | 2 | 5 | 6 | 1 | 5 | A | 5 | 5 | 3996.279 | 0.015 | -0.003 |
|   |   |   |   |   |   |   | 7 | 7 | 3996.398 | 0.015 | -0.001 |
|   |   |   |   |   |   |   | 6 | 6 | 3997.095 | 0.015 | -0.003 |
| 5 | 2 | 4 | 5 | 1 | 4 | A | 4 | 4 | 4009.894 | 0.015 | -0.005 |
|   |   |   |   |   |   |   | 6 | 6 | 4010.064 | 0.015 | -0.001 |
| 5 | 0 | 5 | 4 | 1 | 3 | A | 4 | 3 | 4010.183 | 0.015 | -0.004 |
|   |   |   |   |   |   |   | 6 | 5 | 4010.306 | 0.015 | 0.002  |
|   |   |   |   |   |   |   | 5 | 4 | 4010.466 | 0.015 | -0.001 |
| 5 | 0 | 5 | 4 | 1 | 3 | E | 4 | 3 | 4006.750 | 0.015 | -0.003 |
|   |   |   |   |   |   |   | 6 | 5 | 4006.868 | 0.015 | -0.002 |
|   |   |   |   |   |   |   | 5 | 4 | 4007.028 | 0.015 | -0.003 |
| 5 | 2 | 4 | 5 | 1 | 4 | A | 5 | 5 | 4010.878 | 0.015 | 0.001  |
| 4 | 2 | 3 | 4 | 1 | 3 | A | 3 | 3 | 4021.176 | 0.015 | -0.003 |
|   |   |   |   |   |   |   | 5 | 5 | 4021.440 | 0.015 | 0.002  |
|   |   |   |   |   |   |   | 4 | 4 | 4022.451 | 0.015 | 0.004  |
| 3 | 2 | 1 | 3 | 1 | 3 | A | 4 | 4 | 4058.052 | 0.015 | 0.011  |
|   |   |   |   |   |   |   | 3 | 3 | 4058.684 | 0.030 | 0.005  |
|   |   |   |   |   |   |   | 4 | 3 | 4058.684 | 0.030 | 0.002  |
|   |   |   |   |   |   |   | 2 | 3 | 4058.684 | 0.030 | 0.001  |
| 4 | 2 | 2 | 4 | 1 | 4 | A | 3 | 3 | 4067.252 | 0.015 | -0.002 |
|   |   |   |   |   |   |   | 5 | 5 | 4067.319 | 0.015 | 0.006  |
|   |   |   |   |   |   |   | 4 | 4 | 4067.553 | 0.015 | 0.007  |
| 4 | 1 | 4 | 3 | 1 | 3 | A | 4 | 3 | 4296.066 | 0.015 | 0.002  |
|   |   |   |   |   |   |   | 5 | 4 | 4296.226 | 0.015 | 0.010  |
|   |   |   |   |   |   |   | 3 | 3 | 4297.062 | 0.015 | 0.001  |
| 4 | 2 | 3 | 3 | 2 | 2 | A | 4 | 3 | 4304.818 | 0.030 | 0.004  |
|   |   |   |   |   |   |   | 4 | 4 | 4304.818 | 0.030 | 0.004  |
|   |   |   |   |   |   |   | 5 | 4 | 4305.372 | 0.015 | 0.003  |
| 4 | 2 | 2 | 3 | 2 | 1 | A | 4 | 4 | 4304.931 | 0.030 | 0.002  |
|   |   |   |   |   |   |   | 4 | 3 | 4304.931 | 0.030 | -0.001 |
|   |   |   |   |   |   |   | 5 | 4 | 4305.494 | 0.015 | 0.006  |
|   |   |   |   |   |   |   | 3 | 2 | 4305.631 | 0.030 | 0.000  |
|   |   |   |   |   |   |   | 3 | 3 | 4305.631 | 0.030 | -0.005 |
| 4 | 0 | 4 | 3 | 0 | 3 | A | 4 | 4 | 4303.838 | 0.015 | 0.000  |
|   |   |   |   |   |   |   | 3 | 2 | 4305.099 | 0.015 | -0.002 |
|   |   |   |   |   |   |   | 5 | 4 | 4305.222 | 0.015 | 0.003  |
|   |   |   |   |   |   |   | 3 | 3 | 4306.919 | 0.015 | -0.008 |
| 4 | 0 | 4 | 3 | 0 | 3 | E | 4 | 4 | 4302.893 | 0.015 | -0.004 |
|   |   |   |   |   |   |   | 3 | 2 | 4304.159 | 0.015 | -0.001 |

|       |       |   |     |          |       |        |
|-------|-------|---|-----|----------|-------|--------|
| 4 0 4 | 3 0 3 | E | 4 3 | 4304.248 | 0.015 | -0.003 |
|       |       |   | 5 4 | 4304.280 | 0.015 | 0.001  |
| 4 1 3 | 3 1 2 | A | 4 4 | 4312.862 | 0.015 | -0.004 |
|       |       |   | 4 3 | 4314.263 | 0.015 | 0.005  |
|       |       |   | 3 2 | 4314.345 | 0.015 | 0.002  |
|       |       |   | 5 4 | 4314.430 | 0.015 | 0.001  |
|       |       |   | 3 3 | 4316.225 | 0.015 | 0.001  |
| 4 1 3 | 3 1 2 | E | 4 4 | 4312.700 | 0.015 | -0.006 |
|       |       |   | 4 3 | 4314.094 | 0.015 | -0.001 |
|       |       |   | 3 2 | 4314.182 | 0.015 | -0.001 |
|       |       |   | 5 4 | 4314.263 | 0.015 | -0.004 |
|       |       |   | 3 3 | 4316.057 | 0.015 | -0.001 |
| 3 1 2 | 2 0 2 | A | 3 3 | 4589.472 | 0.015 | 0.001  |
|       |       |   | 2 1 | 4590.623 | 0.015 | -0.004 |
|       |       |   | 3 2 | 4590.775 | 0.015 | -0.003 |
|       |       |   | 4 3 | 4590.863 | 0.015 | -0.002 |
|       |       |   | 2 2 | 4592.663 | 0.015 | 0.004  |
| 3 1 2 | 2 0 2 | E | 3 3 | 4590.260 | 0.015 | 0.006  |
|       |       |   | 2 1 | 4591.404 | 0.015 | 0.000  |
|       |       |   | 3 2 | 4591.561 | 0.015 | 0.000  |
|       |       |   | 4 3 | 4591.644 | 0.015 | 0.001  |
|       |       |   | 2 2 | 4593.430 | 0.015 | -0.006 |
| 6 0 6 | 5 1 4 | A | 5 4 | 5074.727 | 0.015 | -0.008 |
|       |       |   | 7 6 | 5074.837 | 0.015 | 0.003  |
|       |       |   | 6 5 | 5075.081 | 0.015 | 0.001  |
| 6 0 6 | 5 1 4 | E | 5 4 | 5070.094 | 0.015 | 0.011  |
|       |       |   | 7 6 | 5070.187 | 0.015 | 0.004  |
|       |       |   | 6 5 | 5070.425 | 0.015 | -0.002 |
| 5 1 5 | 4 1 4 | A | 5 5 | 5369.307 | 0.015 | 0.003  |
|       |       |   | 5 4 | 5370.099 | 0.015 | 0.003  |
|       |       |   | 6 5 | 5370.187 | 0.015 | 0.009  |
|       |       |   | 4 4 | 5371.159 | 0.015 | 0.010  |
| 5 1 5 | 4 1 4 | E | 5 5 | 5369.116 | 0.030 | -0.007 |
|       |       |   | 5 4 | 5369.927 | 0.030 | 0.010  |
|       |       |   | 6 5 | 5370.015 | 0.030 | 0.016  |
| 5 0 5 | 4 0 4 | A | 6 5 | 5381.393 | 0.030 | 0.012  |
|       |       |   | 4 3 | 5381.300 | 0.030 | -0.010 |
|       |       |   | 4 4 | 5383.045 | 0.015 | -0.001 |
| 5 0 5 | 4 0 4 | E | 4 3 | 5380.143 | 0.015 | 0.001  |
|       |       |   | 6 5 | 5380.221 | 0.015 | 0.009  |
| 5 2 3 | 4 2 2 | A | 6 5 | 5381.783 | 0.030 | -0.013 |
|       |       |   | 4 3 | 5381.838 | 0.030 | 0.011  |
| 5 1 4 | 4 1 3 | A | 5 4 | 5392.831 | 0.030 | -0.007 |
|       |       |   | 4 3 | 5392.880 | 0.030 | 0.013  |
|       |       |   | 6 5 | 5392.932 | 0.015 | 0.001  |
| 5 1 4 | 4 1 3 | E | 5 4 | 5392.656 | 0.030 | -0.008 |
|       |       |   | 4 3 | 5392.704 | 0.030 | 0.010  |
|       |       |   | 6 5 | 5392.756 | 0.015 | -0.002 |
| 4 1 3 | 3 0 3 | A | 4 3 | 5676.085 | 0.015 | -0.001 |
|       |       |   | 3 2 | 5676.221 | 0.030 | -0.003 |
|       |       |   | 5 4 | 5676.293 | 0.030 | -0.002 |
| 4 1 3 | 3 0 3 | E | 4 3 | 5677.411 | 0.015 | -0.002 |
|       |       |   | 3 2 | 5677.548 | 0.030 | -0.001 |
|       |       |   | 5 4 | 5677.621 | 0.030 | -0.001 |
| 6 1 6 | 5 1 5 | A | 6 5 | 6444.057 | 0.015 | -0.003 |
|       |       |   | 7 6 | 6444.116 | 0.015 | 0.007  |
| 6 1 6 | 5 1 5 | E | 6 5 | 6443.838 | 0.015 | 0.000  |
| 6 0 6 | 5 0 5 | A | 6 5 | 6457.445 | 0.030 | -0.006 |
|       |       |   | 7 6 | 6457.445 | 0.030 | -0.017 |
| 6 0 6 | 5 0 5 | E | 6 5 | 6456.062 | 0.030 | 0.003  |
|       |       |   | 7 6 | 6456.062 | 0.030 | -0.009 |

|   |   |   |   |   |   |   |   |   |          |       |        |
|---|---|---|---|---|---|---|---|---|----------|-------|--------|
| 6 | 2 | 5 | 5 | 2 | 4 | A | 7 | 6 | 6457.740 | 0.015 | 0.001  |
| 6 | 2 | 4 | 5 | 2 | 3 | A | 6 | 5 | 6457.980 | 0.015 | -0.002 |
|   |   |   |   |   |   |   | 5 | 4 | 6458.149 | 0.030 | -0.008 |
|   |   |   |   |   |   |   | 7 | 6 | 6458.149 | 0.030 | -0.008 |
| 6 | 1 | 5 | 5 | 1 | 4 | A | 6 | 5 | 6471.350 | 0.030 | 0.004  |
|   |   |   |   |   |   |   | 5 | 4 | 6471.350 | 0.030 | -0.006 |
|   |   |   |   |   |   |   | 7 | 6 | 6471.390 | 0.030 | -0.014 |
| 6 | 1 | 5 | 5 | 1 | 4 | E | 6 | 5 | 6471.146 | 0.030 | 0.010  |
|   |   |   |   |   |   |   | 5 | 4 | 6471.146 | 0.030 | 0.000  |
|   |   |   |   |   |   |   | 7 | 6 | 6471.193 | 0.030 | -0.001 |
| 5 | 1 | 4 | 4 | 0 | 4 | A | 5 | 4 | 6763.728 | 0.015 | -0.005 |
|   |   |   |   |   |   |   | 4 | 3 | 6764.008 | 0.030 | 0.017  |
|   |   |   |   |   |   |   | 6 | 5 | 6764.008 | 0.030 | 0.000  |
| 5 | 1 | 4 | 4 | 0 | 4 | E | 5 | 4 | 6765.824 | 0.015 | -0.002 |
|   |   |   |   |   |   |   | 4 | 3 | 6766.103 | 0.030 | 0.020  |
|   |   |   |   |   |   |   | 6 | 5 | 6766.103 | 0.030 | 0.002  |
| 3 | 2 | 1 | 2 | 1 | 1 | A | 2 | 1 | 7265.915 | 0.015 | -0.001 |
|   |   |   |   |   |   |   | 4 | 3 | 7266.475 | 0.015 | -0.005 |
|   |   |   |   |   |   |   | 3 | 2 | 7267.496 | 0.015 | 0.003  |
| 3 | 2 | 2 | 2 | 1 | 2 | A | 2 | 1 | 7280.062 | 0.015 | -0.005 |
|   |   |   |   |   |   |   | 4 | 3 | 7280.221 | 0.030 | -0.007 |
|   |   |   |   |   |   |   | 3 | 3 | 7280.221 | 0.030 | -0.007 |
|   |   |   |   |   |   |   | 2 | 3 | 7280.221 | 0.030 | -0.007 |
|   |   |   |   |   |   |   | 3 | 2 | 7280.515 | 0.030 | -0.005 |
|   |   |   |   |   |   |   | 2 | 2 | 7280.515 | 0.030 | -0.005 |
| 5 | 2 | 3 | 5 | 1 | 5 | A | 4 | 4 | 4078.925 | 0.030 | -0.002 |
|   |   |   |   |   |   |   | 6 | 6 | 4078.925 | 0.030 | -0.007 |
| 6 | 2 | 4 | 6 | 1 | 6 | A | 6 | 6 | 4092.881 | 0.030 | 0.006  |
|   |   |   |   |   |   |   | 7 | 7 | 4092.975 | 0.030 | -0.005 |
| 7 | 2 | 5 | 7 | 1 | 7 | A | 7 | 7 | 4109.360 | 0.015 | 0.006  |
|   |   |   |   |   |   |   | 8 | 8 | 4109.539 | 0.015 | -0.003 |
| 5 | 2 | 3 | 4 | 2 | 2 | A | 5 | 4 | 5381.508 | 0.015 | 0.004  |
| 5 | 2 | 4 | 4 | 2 | 3 | A | 4 | 3 | 5381.588 | 0.015 | 0.001  |
| 5 | 3 | 3 | 4 | 3 | 2 | A | 6 | 5 | 5381.588 | 0.015 | -0.008 |
| 7 | 1 | 7 | 6 | 1 | 6 | A | 6 | 5 | 7517.977 | 0.015 | -0.002 |
| 7 | 1 | 7 | 6 | 1 | 6 | E | 6 | 5 | 7517.729 | 0.015 | 0.004  |
| 7 | 0 | 7 | 6 | 0 | 6 | A | 7 | 6 | 7533.451 | 0.030 | 0.014  |
|   |   |   |   |   |   |   | 8 | 7 | 7533.451 | 0.030 | 0.007  |
| 7 | 0 | 7 | 6 | 0 | 6 | E | 7 | 6 | 7531.817 | 0.030 | -0.010 |
|   |   |   |   |   |   |   | 8 | 7 | 7531.817 | 0.030 | -0.017 |
| 7 | 2 | 6 | 6 | 2 | 5 | A | 8 | 7 | 7533.889 | 0.015 | -0.001 |
| 7 | 1 | 6 | 6 | 1 | 5 | A | 6 | 5 | 7549.794 | 0.030 | -0.001 |
|   |   |   |   |   |   |   | 7 | 6 | 7549.794 | 0.030 | 0.001  |
| 6 | 1 | 5 | 5 | 0 | 5 | A | 7 | 6 | 7854.042 | 0.030 | 0.010  |
|   |   |   |   |   |   |   | 5 | 4 | 7854.042 | 0.030 | 0.006  |
| 4 | 2 | 3 | 3 | 1 | 3 | A | 3 | 2 | 8363.269 | 0.015 | 0.001  |
|   |   |   |   |   |   |   | 5 | 4 | 8363.351 | 0.015 | 0.001  |
|   |   |   |   |   |   |   | 4 | 3 | 8363.433 | 0.015 | -0.003 |
| 8 | 1 | 8 | 7 | 1 | 7 | A | 9 | 8 | 8591.822 | 0.015 | -0.008 |
| 8 | 0 | 8 | 7 | 0 | 7 | A | 8 | 7 | 8609.311 | 0.030 | 0.003  |
|   |   |   |   |   |   |   | 9 | 8 | 8609.311 | 0.030 | -0.001 |
| 8 | 0 | 8 | 7 | 0 | 7 | E | 8 | 7 | 8607.482 | 0.030 | -0.001 |
|   |   |   |   |   |   |   | 9 | 8 | 8607.482 | 0.030 | -0.005 |

**Table S12.** Observed rotational frequencies for the conformer A of the pyridine···acetone complex.

| J | K-K <sub>+</sub> | J' | K'-K' <sub>+</sub> | Sym | F | F' | obs/MHz  | Err/MHz | obs-calc/MHz |
|---|------------------|----|--------------------|-----|---|----|----------|---------|--------------|
| 2 | 1 1              | 2  | 0 2                | EE  | 3 | 3  | 2200.059 | 0.015   | -0.008       |
|   |                  |    |                    |     | 2 | 2  | 2201.138 | 0.015   | -0.001       |
| 3 | 1 2              | 3  | 0 3                | EE  | 3 | 3  | 2282.134 | 0.015   | 0.008        |
|   |                  |    |                    |     | 4 | 4  | 2281.350 | 0.015   | 0.002        |
| 4 | 1 3              | 4  | 0 4                | EE  | 5 | 5  | 2393.011 | 0.015   | 0.011        |
|   |                  |    |                    |     | 4 | 4  | 2393.671 | 0.015   | 0.001        |
|   |                  |    |                    |     | 3 | 3  | 2392.830 | 0.015   | 0.001        |
| 2 | 0 2              | 1  | 0 1                | EE  | 3 | 2  | 2404.435 | 0.015   | 0.002        |
|   |                  |    |                    |     | 2 | 1  | 2404.328 | 0.015   | -0.006       |
| 2 | 1 1              | 1  | 1 0                | EE  | 3 | 2  | 2457.476 | 0.015   | 0.003        |
|   |                  |    |                    |     | 2 | 1  | 2456.223 | 0.015   | 0.010        |
| 2 | 1 1              | 1  | 1 0                | AE  | 3 | 2  | 2457.197 | 0.015   | 0.006        |
| 1 | 1 1              | 0  | 0 0                | AA  | 2 | 1  | 3297.983 | 0.015   | 0.002        |
| 1 | 1 1              | 0  | 0 0                | EE  | 1 | 1  | 3298.086 | 0.015   | -0.003       |
|   |                  |    |                    |     | 2 | 1  | 3297.842 | 0.015   | 0.006        |
| 3 | 1 3              | 2  | 1 2                | AA  | 4 | 3  | 3529.849 | 0.015   | -0.001       |
|   |                  |    |                    |     | 3 | 2  | 3529.470 | 0.015   | 0.008        |
| 3 | 1 3              | 2  | 1 2                | EE  | 4 | 3  | 3529.702 | 0.015   | -0.001       |
|   |                  |    |                    |     | 2 | 1  | 3529.620 | 0.015   | 0.000        |
|   |                  |    |                    |     | 3 | 2  | 3529.318 | 0.015   | 0.002        |
| 3 | 0 3              | 2  | 0 2                | AA  | 4 | 3  | 3604.474 | 0.015   | 0.001        |
|   |                  |    |                    |     | 3 | 2  | 3604.408 | 0.015   | -0.001       |
| 3 | 0 3              | 2  | 0 2                | EE  | 4 | 3  | 3604.166 | 0.015   | 0.002        |
|   |                  |    |                    |     | 3 | 2  | 3604.098 | 0.015   | -0.002       |
|   |                  |    |                    |     | 2 | 1  | 3603.909 | 0.015   | -0.002       |
|   |                  |    |                    |     | 3 | 3  | 3602.747 | 0.015   | -0.011       |
| 3 | 0 3              | 2  | 0 2                | AE  | 4 | 3  | 3603.969 | 0.015   | -0.005       |
|   |                  |    |                    |     | 3 | 2  | 3603.909 | 0.015   | 0.000        |
| 3 | 0 3              | 2  | 0 2                | EA  | 4 | 3  | 3603.741 | 0.015   | 0.005        |
|   |                  |    |                    |     | 3 | 2  | 3603.676 | 0.015   | 0.004        |
| 3 | 1 2              | 2  | 1 1                | AA  | 4 | 3  | 3685.624 | 0.015   | 0.005        |
|   |                  |    |                    |     | 3 | 2  | 3685.264 | 0.015   | 0.003        |
| 3 | 1 2              | 2  | 1 1                | EE  | 2 | 1  | 3685.515 | 0.015   | 0.001        |
|   |                  |    |                    |     | 4 | 3  | 3685.446 | 0.015   | 0.002        |
|   |                  |    |                    |     | 3 | 2  | 3685.084 | 0.015   | -0.002       |
| 5 | 0 5              | 4  | 1 4                | AA  | 6 | 5  | 4121.310 | 0.015   | -0.005       |
| 5 | 0 5              | 4  | 1 4                | EE  | 5 | 4  | 4120.379 | 0.015   | 0.003        |
|   |                  |    |                    |     | 6 | 5  | 4120.255 | 0.015   | 0.004        |
|   |                  |    |                    |     | 4 | 3  | 4120.147 | 0.015   | 0.007        |
| 5 | 0 5              | 4  | 1 4                | AE  | 6 | 5  | 4120.464 | 0.015   | 0.006        |
| 2 | 1 2              | 1  | 0 1                | AA  | 3 | 2  | 4448.857 | 0.015   | 0.004        |
| 2 | 1 2              | 1  | 0 1                | EE  | 2 | 1  | 4448.958 | 0.015   | 0.010        |
|   |                  |    |                    |     | 3 | 2  | 4448.773 | 0.015   | 0.005        |
|   |                  |    |                    |     | 2 | 2  | 4447.697 | 0.015   | -0.008       |
|   |                  |    |                    |     | 1 | 0  | 4447.498 | 0.015   | 0.005        |
|   |                  |    |                    |     | 1 | 1  | 4450.594 | 0.015   | -0.007       |
| 4 | 1 4              | 3  | 1 3                | AA  | 5 | 4  | 4705.259 | 0.015   | 0.001        |
|   |                  |    |                    |     | 3 | 2  | 4705.166 | 0.015   | -0.003       |
| 4 | 1 4              | 3  | 1 3                | EE  | 5 | 4  | 4705.050 | 0.015   | -0.009       |
|   |                  |    |                    |     | 3 | 2  | 4704.964 | 0.015   | -0.006       |
|   |                  |    |                    |     | 4 | 3  | 4704.876 | 0.015   | -0.004       |
| 4 | 1 4              | 3  | 1 3                | AE  | 4 | 3  | 4704.465 | 0.015   | 0.007        |
|   |                  |    |                    |     | 3 | 2  | 4704.550 | 0.015   | 0.001        |
|   |                  |    |                    |     | 5 | 4  | 4704.636 | 0.015   | -0.001       |
| 4 | 0 4              | 3  | 0 3                | AA  | 3 | 2  | 4801.354 | 0.015   | 0.001        |



|   |   |   |   |   |   |    |   |   |          |       |        |
|---|---|---|---|---|---|----|---|---|----------|-------|--------|
| 4 | 0 | 4 | 3 | 0 | 3 | AA | 4 | 3 | 4801.417 | 0.030 | -0.001 |
|   |   |   |   |   |   |    | 5 | 4 | 4801.465 | 0.030 | -0.005 |
| 4 | 0 | 4 | 3 | 0 | 3 | EE | 3 | 2 | 4800.927 | 0.015 | 0.000  |
|   |   |   |   |   |   |    | 4 | 3 | 4800.998 | 0.030 | 0.006  |
|   |   |   |   |   |   |    | 5 | 4 | 4801.041 | 0.030 | -0.003 |
| 4 | 0 | 4 | 3 | 0 | 3 | AE | 3 | 2 | 4800.690 | 0.015 | -0.005 |
|   |   |   |   |   |   |    | 4 | 3 | 4800.761 | 0.030 | 0.000  |
|   |   |   |   |   |   |    | 5 | 4 | 4800.810 | 0.030 | -0.003 |
| 4 | 0 | 4 | 3 | 0 | 3 | EA | 3 | 2 | 4800.304 | 0.015 | -0.002 |
|   |   |   |   |   |   |    | 4 | 3 | 4800.372 | 0.030 | 0.000  |
|   |   |   |   |   |   |    | 5 | 4 | 4800.415 | 0.030 | -0.009 |
| 4 | 1 | 3 | 3 | 1 | 2 | AA | 4 | 3 | 4912.761 | 0.015 | 0.003  |
|   |   |   |   |   |   |    | 5 | 4 | 4912.923 | 0.015 | 0.005  |
| 4 | 1 | 3 | 3 | 1 | 2 | EE | 5 | 4 | 4912.699 | 0.015 | 0.002  |
|   |   |   |   |   |   |    | 4 | 3 | 4912.537 | 0.015 | 0.001  |
| 4 | 1 | 3 | 3 | 1 | 2 | EA | 4 | 3 | 4912.254 | 0.015 | 0.001  |
|   |   |   |   |   |   |    | 5 | 4 | 4912.414 | 0.015 | 0.000  |
| 6 | 0 | 6 | 5 | 1 | 5 | AA | 6 | 5 | 5425.025 | 0.015 | -0.010 |
|   |   |   |   |   |   |    | 7 | 6 | 5424.857 | 0.015 | 0.002  |
|   |   |   |   |   |   |    | 5 | 4 | 5424.769 | 0.015 | 0.005  |
| 6 | 0 | 6 | 5 | 1 | 5 | EE | 6 | 5 | 5423.492 | 0.015 | 0.007  |
|   |   |   |   |   |   |    | 7 | 6 | 5423.309 | 0.015 | 0.004  |
|   |   |   |   |   |   |    | 5 | 4 | 5423.223 | 0.015 | 0.009  |
| 6 | 0 | 6 | 5 | 1 | 5 | AE | 5 | 4 | 5423.743 | 0.015 | -0.001 |
|   |   |   |   |   |   |    | 7 | 6 | 5423.835 | 0.015 | 0.000  |
|   |   |   |   |   |   |    | 6 | 5 | 5424.022 | 0.015 | 0.007  |
| 6 | 0 | 6 | 5 | 1 | 5 | EA | 5 | 4 | 5419.583 | 0.015 | -0.007 |
|   |   |   |   |   |   |    | 7 | 6 | 5419.682 | 0.015 | 0.001  |
|   |   |   |   |   |   |    | 6 | 5 | 5419.858 | 0.015 | -0.001 |
| 3 | 1 | 3 | 2 | 0 | 2 | EE | 4 | 3 | 5574.035 | 0.015 | -0.003 |
|   |   |   |   |   |   |    | 3 | 2 | 5573.922 | 0.015 | -0.007 |
|   |   |   |   |   |   |    | 2 | 1 | 5573.795 | 0.015 | -0.005 |
| 3 | 1 | 3 | 2 | 0 | 2 | AE | 4 | 3 | 5573.582 | 0.015 | 0.004  |
|   |   |   |   |   |   |    | 3 | 2 | 5573.469 | 0.015 | 0.000  |
|   |   |   |   |   |   |    | 2 | 1 | 5573.334 | 0.015 | -0.006 |
| 3 | 1 | 3 | 2 | 0 | 2 | EA | 4 | 3 | 5574.436 | 0.015 | 0.000  |
|   |   |   |   |   |   |    | 3 | 2 | 5574.328 | 0.015 | 0.001  |
|   |   |   |   |   |   |    | 2 | 1 | 5574.194 | 0.015 | -0.005 |
| 5 | 1 | 5 | 4 | 1 | 4 | AA | 5 | 4 | 5879.676 | 0.015 | 0.007  |
|   |   |   |   |   |   |    | 6 | 5 | 5879.781 | 0.015 | 0.009  |
| 5 | 1 | 5 | 4 | 1 | 4 | EE | 6 | 5 | 5879.550 | 0.015 | 0.006  |
|   |   |   |   |   |   |    | 4 | 3 | 5879.485 | 0.015 | 0.007  |
|   |   |   |   |   |   |    | 5 | 4 | 5879.445 | 0.015 | 0.003  |
| 5 | 1 | 5 | 4 | 1 | 4 | AE | 5 | 4 | 5878.871 | 0.015 | 0.001  |
|   |   |   |   |   |   |    | 4 | 3 | 5878.914 | 0.015 | 0.007  |
|   |   |   |   |   |   |    | 6 | 5 | 5878.978 | 0.015 | 0.005  |
| 5 | 0 | 5 | 4 | 0 | 4 | AA | 6 | 5 | 5994.694 | 0.015 | -0.006 |
|   |   |   |   |   |   |    | 4 | 3 | 5994.614 | 0.015 | -0.017 |
| 5 | 0 | 5 | 4 | 0 | 4 | EE | 6 | 5 | 5994.135 | 0.015 | -0.006 |
|   |   |   |   |   |   |    | 4 | 3 | 5994.062 | 0.015 | -0.010 |
| 5 | 0 | 5 | 4 | 0 | 4 | AE | 6 | 5 | 5993.881 | 0.015 | -0.007 |
| 5 | 0 | 5 | 4 | 0 | 4 | EA | 6 | 5 | 5993.267 | 0.015 | -0.009 |
| 5 | 1 | 4 | 4 | 1 | 3 | AA | 5 | 4 | 6139.118 | 0.015 | -0.001 |
|   |   |   |   |   |   |    | 6 | 5 | 6139.207 | 0.015 | -0.004 |
| 5 | 1 | 4 | 4 | 1 | 3 | EE | 5 | 4 | 6138.840 | 0.015 | 0.002  |
|   |   |   |   |   |   |    | 6 | 5 | 6138.923 | 0.015 | -0.006 |
| 4 | 1 | 4 | 3 | 0 | 3 | AA | 4 | 3 | 6674.629 | 0.015 | -0.001 |
|   |   |   |   |   |   |    | 3 | 2 | 6674.784 | 0.015 | 0.003  |

|       |       |    |     |          |       |        |
|-------|-------|----|-----|----------|-------|--------|
| 4 1 4 | 3 0 3 | AA | 5 4 | 6674.856 | 0.015 | 0.003  |
| 4 1 4 | 3 0 3 | EE | 4 3 | 6674.707 | 0.015 | -0.002 |
|       |       |    | 3 2 | 6674.856 | 0.015 | -0.003 |
|       |       |    | 5 4 | 6674.931 | 0.015 | -0.001 |
| 4 1 4 | 3 0 3 | AE | 4 3 | 6674.017 | 0.015 | -0.002 |
|       |       |    | 3 2 | 6674.164 | 0.015 | -0.005 |
|       |       |    | 5 4 | 6674.241 | 0.015 | -0.001 |
| 4 1 4 | 3 0 3 | EA | 4 3 | 6675.555 | 0.015 | -0.002 |
|       |       |    | 3 2 | 6675.702 | 0.015 | -0.005 |
|       |       |    | 5 4 | 6675.779 | 0.015 | -0.001 |
| 7 0 7 | 6 1 6 | AA | 6 5 | 6738.187 | 0.015 | -0.001 |
|       |       |    | 8 7 | 6738.261 | 0.015 | 0.000  |
|       |       |    | 7 6 | 6738.463 | 0.015 | 0.001  |
| 7 0 7 | 6 1 6 | EE | 7 6 | 6736.245 | 0.015 | 0.005  |
|       |       |    | 8 7 | 6736.044 | 0.015 | 0.005  |
|       |       |    | 6 5 | 6735.972 | 0.015 | 0.006  |
| 7 0 7 | 6 1 6 | AE | 6 5 | 6737.024 | 0.015 | -0.002 |
|       |       |    | 8 7 | 6737.098 | 0.015 | -0.001 |
|       |       |    | 7 6 | 6737.297 | 0.015 | -0.003 |
| 7 0 7 | 6 1 6 | EA | 6 5 | 6730.478 | 0.015 | 0.002  |
|       |       |    | 8 7 | 6730.550 | 0.015 | 0.001  |
|       |       |    | 7 6 | 6730.748 | 0.015 | -0.001 |
| 6 1 6 | 5 1 5 | AA | 7 6 | 7053.192 | 0.015 | 0.006  |
|       |       |    | 6 5 | 7053.115 | 0.015 | -0.004 |
| 6 1 6 | 5 1 5 | EE | 7 6 | 7052.952 | 0.015 | -0.002 |
|       |       |    | 6 5 | 7052.880 | 0.015 | -0.006 |
| 6 1 6 | 5 1 5 | AE | 7 6 | 7052.214 | 0.015 | -0.002 |
| 6 0 6 | 5 0 5 | AA | 7 6 | 7183.284 | 0.030 | -0.028 |
|       |       |    | 6 5 | 7183.284 | 0.030 | 0.018  |
| 6 0 6 | 5 0 5 | EE | 7 6 | 7182.569 | 0.030 | -0.028 |
|       |       |    | 6 5 | 7182.569 | 0.030 | 0.019  |
| 6 0 6 | 5 0 5 | AE | 7 6 | 7182.321 | 0.015 | -0.029 |
|       |       |    | 6 5 | 7182.321 | 0.015 | 0.018  |
| 6 0 6 | 5 0 5 | EA | 7 6 | 7181.390 | 0.030 | -0.028 |
|       |       |    | 6 5 | 7181.390 | 0.030 | 0.019  |
| 6 2 5 | 5 2 4 | EE | 7 6 | 7211.940 | 0.030 | 0.007  |
|       |       |    | 5 4 | 7211.940 | 0.030 | 0.007  |
|       |       |    | 6 5 | 7211.754 | 0.015 | 0.002  |
| 6 2 5 | 5 2 4 | EA | 6 5 | 7211.056 | 0.015 | -0.003 |
|       |       |    | 7 6 | 7211.232 | 0.030 | -0.008 |
|       |       |    | 5 4 | 7211.232 | 0.030 | -0.008 |
| 6 2 4 | 5 2 3 | AA | 6 5 | 7244.852 | 0.015 | -0.002 |
|       |       |    | 5 4 | 7244.997 | 0.030 | -0.004 |
|       |       |    | 7 6 | 7244.997 | 0.030 | -0.006 |
| 6 2 4 | 5 2 3 | EE | 7 6 | 7244.293 | 0.030 | -0.007 |
|       |       |    | 5 4 | 7244.293 | 0.030 | -0.004 |
|       |       |    | 6 5 | 7244.154 | 0.015 | 0.003  |
| 6 1 5 | 5 1 4 | AA | 7 6 | 7364.182 | 0.030 | 0.001  |
|       |       |    | 5 4 | 7364.182 | 0.030 | 0.022  |
|       |       |    | 6 5 | 7364.105 | 0.015 | -0.017 |
| 6 1 5 | 5 1 4 | EE | 7 6 | 7363.831 | 0.030 | -0.001 |
|       |       |    | 5 4 | 7363.831 | 0.030 | 0.019  |
|       |       |    | 6 5 | 7363.753 | 0.015 | -0.020 |
| 6 1 5 | 5 1 4 | AE | 7 6 | 7363.561 | 0.030 | -0.006 |
|       |       |    | 5 4 | 7363.561 | 0.030 | 0.015  |
| 6 1 5 | 5 1 4 | EA | 7 6 | 7363.393 | 0.030 | -0.007 |
|       |       |    | 5 4 | 7363.393 | 0.030 | 0.014  |
| 5 1 5 | 4 0 4 | AA | 5 4 | 7752.884 | 0.015 | 0.003  |

|   |   |   |   |   |   |    |   |   |          |       |       |
|---|---|---|---|---|---|----|---|---|----------|-------|-------|
| 5 | 1 | 5 | 4 | 0 | 4 | AA | 4 | 3 | 7753.162 | 0.030 | 0.028 |
|   |   |   |   |   |   |    | 6 | 5 | 7753.162 | 0.030 | 0.006 |
| 5 | 1 | 5 | 4 | 0 | 4 | EE | 5 | 4 | 7753.162 | 0.015 | 0.004 |
|   |   |   |   |   |   |    | 4 | 3 | 7753.443 | 0.030 | 0.032 |
|   |   |   |   |   |   |    | 6 | 5 | 7753.443 | 0.030 | 0.010 |
| 5 | 1 | 5 | 4 | 0 | 4 | AE | 5 | 4 | 7752.134 | 0.015 | 0.006 |
|   |   |   |   |   |   |    | 4 | 3 | 7752.414 | 0.030 | 0.033 |
|   |   |   |   |   |   |    | 6 | 5 | 7752.414 | 0.030 | 0.012 |
| 5 | 1 | 5 | 4 | 0 | 4 | EA | 5 | 4 | 7754.742 | 0.015 | 0.001 |
|   |   |   |   |   |   |    | 4 | 3 | 7755.029 | 0.030 | 0.036 |
|   |   |   |   |   |   |    | 6 | 5 | 7755.029 | 0.030 | 0.014 |
